# Supplementary material for: A trans-eQTL network regulates osteoclast multinucleation and bone mass
Source: eLife. 2020 Jun 19;9:e55549. doi: 10.7554/eLife.55549 (PMC7351491; doi:10.7554/eLife.55549)
Supplement: Figure 1—source data 1. [file elife-55549-fig1-data1.xlsx]

## Sheet: heel bone mineral density_topGW
DATE ADDED TO CATALOG	PUBMEDID	FIRST AUTHOR	DATE	JOURNAL	LINK	STUDY	TRAIT	INITIAL SAMPLE SIZE	REPLICATION SAMPLE SIZE	REGION	CHR_ID	CHR_POS	REPORTED GENE(S)	MMnet GENE	GWAS mapped genes	UPSTREAM_GENE_ID	DOWNSTREAM_GENE_ID	GENE ID	UPSTREAM_GENE_DISTANCE	DOWNSTREAM_GENE_DISTANCE	STRONGEST SNP-RISK ALLELE	SNP	MERGED	SNP_ID_CURRENT	CONTEXT	INTERGENIC	RISK ALLELE FREQUENCY	P-VALUE	PVALUE_MLOG	P-VALUE (TEXT)	OR or BETA	95% CI	PLATFORM [SNPS PASSING QC]	CNV	MAPPED_TRAIT	MAPPED_TRAIT_URI	STUDY ACCESSION	GENOTYPING TECHNOLOGY	P.VALUEnum
2019-01-28	30598549	Morris JA	2018-12-31	Nat Genet	www.ncbi.nlm.nih.gov/pubmed/30598549	An atlas of genetic influences on osteoporosis in humans and mice.	Heel bone mineral density	426,824 British ancestry individuals	NA	6p21.1	6	45896847	CLIC5	CLIC5	CLIC5			ENSG00000112782	NA	NA	rs56253836-A	rs56253836	0	56253836	intron_variant	0	0.585203	2e-11	10.699		0.0124271	[0.0088-0.0161] unit increase	NR [13737936] (imputed)	N	heel bone mineral density	http://www.ebi.ac.uk/efo/EFO_0009270	GCST006979	Genome-wide genotyping array	2e-11
2019-02-08	30595370	Kichaev G	2018-12-27	Am J Hum Genet	www.ncbi.nlm.nih.gov/pubmed/30595370	Leveraging Polygenic Functional Enrichment to Improve GWAS Power.	Heel bone mineral density	approximately 446,000 European ancestry individuals	NA	6p12.1	6	56533221		DST	DST			ENSG00000151914	NA	NA	rs4288197-?	rs4288197	0	4288197	intron_variant	0	NR	5e-17	16.301		NA		NR [~ 8900000] (imputed)	N	heel bone mineral density	http://www.ebi.ac.uk/efo/EFO_0009270	GCST007066	Genome-wide genotyping array	5e-17
2019-02-08	30595370	Kichaev G	2018-12-27	Am J Hum Genet	www.ncbi.nlm.nih.gov/pubmed/30595370	Leveraging Polygenic Functional Enrichment to Improve GWAS Power.	Heel bone mineral density	approximately 446,000 European ancestry individuals	NA	10q21.2	10	61343016		TMEM26	LINC00845 - TMEM26	ENSG00000227244	ENSG00000196932		316596	63627	rs2204015-?	rs2204015	0	2204015	regulatory_region_variant	1	NR	1e-07	7		NA		NR [~ 8900000] (imputed)	N	heel bone mineral density	http://www.ebi.ac.uk/efo/EFO_0009270	GCST007066	Genome-wide genotyping array	1e-07
2018-10-18	30048462	Kim SK	2018-07-26	PLoS One	www.ncbi.nlm.nih.gov/pubmed/30048462	Identification of 613 new loci associated with heel bone mineral density and a polygenic risk score for bone mineral density, osteoporosis and fracture.	Heel bone mineral density	394,929 European ancestry individuals	NA	13q12.12	13	24254712		SPATA13	AL359736.1, SPATA13			ENSG00000273167, ENSG00000182957	NA	NA	rs75439322-?	rs75439322	0	75439322	intron_variant	0	NR	7e-27	26.1549		0.0383681	[0.031-0.046] unit decrease	Affymetrix [20259828] (imputed)	N	heel bone mineral density	http://www.ebi.ac.uk/efo/EFO_0009270	GCST006433	Genome-wide genotyping array	7e-27
2019-02-08	30595370	Kichaev G	2018-12-27	Am J Hum Genet	www.ncbi.nlm.nih.gov/pubmed/30595370	Leveraging Polygenic Functional Enrichment to Improve GWAS Power.	Heel bone mineral density	approximately 446,000 European ancestry individuals	NA	1p34.2	1	41505556		HIVEP3	EDN2 - HIVEP3	ENSG00000127129	ENSG00000127124		20873	809	rs12043801-?	rs12043801	0	12043801	intergenic_variant	1	NR	6e-12	11.2218		NA		NR [~ 8900000] (imputed)	N	heel bone mineral density	http://www.ebi.ac.uk/efo/EFO_0009270	GCST007066	Genome-wide genotyping array	6e-12
2019-02-08	30595370	Kichaev G	2018-12-27	Am J Hum Genet	www.ncbi.nlm.nih.gov/pubmed/30595370	Leveraging Polygenic Functional Enrichment to Improve GWAS Power.	Heel bone mineral density	approximately 446,000 European ancestry individuals	NA	12q24.31	12	123265681		CDK2AP1	CDK2AP1			ENSG00000111328	NA	NA	rs12824957-?	rs12824957	0	12824957	intron_variant	0	NR	2e-22	21.699		NA		NR [~ 8900000] (imputed)	N	heel bone mineral density	http://www.ebi.ac.uk/efo/EFO_0009270	GCST007066	Genome-wide genotyping array	2e-22
2019-02-08	30595370	Kichaev G	2018-12-27	Am J Hum Genet	www.ncbi.nlm.nih.gov/pubmed/30595370	Leveraging Polygenic Functional Enrichment to Improve GWAS Power.	Heel bone mineral density	approximately 446,000 European ancestry individuals	NA	9q34.11	9	127558278		FAM129B	FAM129B			ENSG00000136830	NA	NA	rs72767980-?	rs72767980	0	72767980	intron_variant	0	NR	5e-27	26.301		NA		NR [~ 8900000] (imputed)	N	heel bone mineral density	http://www.ebi.ac.uk/efo/EFO_0009270	GCST007066	Genome-wide genotyping array	5e-27
2019-01-28	30598549	Morris JA	2018-12-31	Nat Genet	www.ncbi.nlm.nih.gov/pubmed/30598549	An atlas of genetic influences on osteoporosis in humans and mice.	Heel bone mineral density	426,824 British ancestry individuals	NA	3q27.2	3	185812502	IGF2BP2	IGF2BP2	IGF2BP2			ENSG00000073792	NA	NA	rs6769511-T	rs6769511	0	6769511	intron_variant	0	0.687	5e-14	13.301		0.0149742	[0.011-0.019] unit decrease	NR [13737936] (imputed)	N	heel bone mineral density	http://www.ebi.ac.uk/efo/EFO_0009270	GCST006979	Genome-wide genotyping array	5e-14
2019-02-08	30595370	Kichaev G	2018-12-27	Am J Hum Genet	www.ncbi.nlm.nih.gov/pubmed/30595370	Leveraging Polygenic Functional Enrichment to Improve GWAS Power.	Heel bone mineral density	approximately 446,000 European ancestry individuals	NA	1p36.11	1	24845182		CLIC4	CLIC4 - RUNX3	ENSG00000169504	ENSG00000020633		861	54329	rs12135380-?	rs12135380	0	12135380	intergenic_variant	1	NR	4e-15	14.3979		NA		NR [~ 8900000] (imputed)	N	heel bone mineral density	http://www.ebi.ac.uk/efo/EFO_0009270	GCST007066	Genome-wide genotyping array	4e-15
2018-10-18	30048462	Kim SK	2018-07-26	PLoS One	www.ncbi.nlm.nih.gov/pubmed/30048462	Identification of 613 new loci associated with heel bone mineral density and a polygenic risk score for bone mineral density, osteoporosis and fracture.	Heel bone mineral density	394,929 European ancestry individuals	NA	2q35	2	218291184		TMBIM1	TMBIM1, PNKD			ENSG00000135926, ENSG00000127838	NA	NA	rs2382818-?	rs2382818	0	2382818	intron_variant	0	NR	6e-09	8.22185		0.0121303	[0.008-0.0163] unit decrease	Affymetrix [20259828] (imputed)	N	heel bone mineral density	http://www.ebi.ac.uk/efo/EFO_0009270	GCST006433	Genome-wide genotyping array	6e-09
2018-10-18	30048462	Kim SK	2018-07-26	PLoS One	www.ncbi.nlm.nih.gov/pubmed/30048462	Identification of 613 new loci associated with heel bone mineral density and a polygenic risk score for bone mineral density, osteoporosis and fracture.	Heel bone mineral density	394,929 European ancestry individuals	NA	4q22.1	4	87910097		SPP1	HSP90AB3P - SPP1	ENSG00000183199	ENSG00000118785		16082	65553	rs11934731-?	rs11934731	0	11934731	intergenic_variant	1	NR	2e-70	69.699		0.0379469	[0.034-0.042] unit increase	Affymetrix [20259828] (imputed)	N	heel bone mineral density	http://www.ebi.ac.uk/efo/EFO_0009270	GCST006433	Genome-wide genotyping array	2e-70
2018-10-18	30048462	Kim SK	2018-07-26	PLoS One	www.ncbi.nlm.nih.gov/pubmed/30048462	Identification of 613 new loci associated with heel bone mineral density and a polygenic risk score for bone mineral density, osteoporosis and fracture.	Heel bone mineral density	394,929 European ancestry individuals	NA	17q21.2	17	41757519		JUP	JUP			ENSG00000173801	NA	NA	rs143043662-?	rs143043662	0	143043662	missense_variant	0	NR	2e-16	15.699		0.0780376	[0.059-0.097] unit decrease	Affymetrix [20259828] (imputed)	N	heel bone mineral density	http://www.ebi.ac.uk/efo/EFO_0009270	GCST006433	Genome-wide genotyping array	2e-16
2019-02-08	30595370	Kichaev G	2018-12-27	Am J Hum Genet	www.ncbi.nlm.nih.gov/pubmed/30595370	Leveraging Polygenic Functional Enrichment to Improve GWAS Power.	Heel bone mineral density	approximately 446,000 European ancestry individuals	NA	12p12.1	12	26074751		RASSF8	RASSF8			ENSG00000123094	NA	NA	rs7138742-?	rs7138742	0	7138742	intron_variant	0	NR	1e-12	12		NA		NR [~ 8900000] (imputed)	N	heel bone mineral density	http://www.ebi.ac.uk/efo/EFO_0009270	GCST007066	Genome-wide genotyping array	1e-12
2019-02-08	30595370	Kichaev G	2018-12-27	Am J Hum Genet	www.ncbi.nlm.nih.gov/pubmed/30595370	Leveraging Polygenic Functional Enrichment to Improve GWAS Power.	Heel bone mineral density	approximately 446,000 European ancestry individuals	NA	14q32.2	14	99896999		EML1	EML1			ENSG00000066629	NA	NA	rs17652784-?	rs17652784	0	17652784	intron_variant	0	NR	1e-08	8		NA		NR [~ 8900000] (imputed)	N	heel bone mineral density	http://www.ebi.ac.uk/efo/EFO_0009270	GCST007066	Genome-wide genotyping array	1e-08
2019-02-08	30595370	Kichaev G	2018-12-27	Am J Hum Genet	www.ncbi.nlm.nih.gov/pubmed/30595370	Leveraging Polygenic Functional Enrichment to Improve GWAS Power.	Heel bone mineral density	approximately 446,000 European ancestry individuals	NA	19p13.3	19	2176404		DOT1L	DOT1L			ENSG00000104885	NA	NA	rs11880992-?	rs11880992	0	11880992	intron_variant	0	NR	1e-24	24		NA		NR [~ 8900000] (imputed)	N	heel bone mineral density	http://www.ebi.ac.uk/efo/EFO_0009270	GCST007066	Genome-wide genotyping array	1e-24
2019-01-28	30598549	Morris JA	2018-12-31	Nat Genet	www.ncbi.nlm.nih.gov/pubmed/30598549	An atlas of genetic influences on osteoporosis in humans and mice.	Heel bone mineral density	426,824 British ancestry individuals	NA	20q13.12	20	46002657	MMP9	MMP9	FTLP1 - MMP9	ENSG00000235525	ENSG00000100985		26582	6251	rs8121146-C	rs8121146	0	8121146	intergenic_variant	1	0.46198	3e-09	8.52288		0.0110673	[0.0074-0.0147] unit increase	NR [13737936] (imputed)	N	heel bone mineral density	http://www.ebi.ac.uk/efo/EFO_0009270	GCST006979	Genome-wide genotyping array	3e-09
2018-10-18	30048462	Kim SK	2018-07-26	PLoS One	www.ncbi.nlm.nih.gov/pubmed/30048462	Identification of 613 new loci associated with heel bone mineral density and a polygenic risk score for bone mineral density, osteoporosis and fracture.	Heel bone mineral density	394,929 European ancestry individuals	NA	11q12.2	11	60180901		MS4A6A	MS4A6A			ENSG00000110077	NA	NA	rs17602572-?	rs17602572	0	17602572	non_coding_transcript_exon_variant	0	NR	1e-43	43		0.028065	[0.024-0.032] unit increase	Affymetrix [20259828] (imputed)	N	heel bone mineral density	http://www.ebi.ac.uk/efo/EFO_0009270	GCST006433	Genome-wide genotyping array	1e-43
2018-10-18	30048462	Kim SK	2018-07-26	PLoS One	www.ncbi.nlm.nih.gov/pubmed/30048462	Identification of 613 new loci associated with heel bone mineral density and a polygenic risk score for bone mineral density, osteoporosis and fracture.	Heel bone mineral density	394,929 European ancestry individuals	NA	4p16.3	4	1009234		IDUA	IDUA - FGFRL1	ENSG00000127415	ENSG00000127418		4670	702	rs4505759-?	rs4505759	0	4505759	regulatory_region_variant	1	NR	1e-179	179		0.0618336	[0.057-0.066] unit decrease	Affymetrix [20259828] (imputed)	N	heel bone mineral density	http://www.ebi.ac.uk/efo/EFO_0009270	GCST006433	Genome-wide genotyping array	1e-179
2019-02-08	30595370	Kichaev G	2018-12-27	Am J Hum Genet	www.ncbi.nlm.nih.gov/pubmed/30595370	Leveraging Polygenic Functional Enrichment to Improve GWAS Power.	Heel bone mineral density	approximately 446,000 European ancestry individuals	NA	11q24.3	11	128815467		FLI1	FLI1 - KCNJ1	ENSG00000151702	ENSG00000151704		2200	20848	rs550621-?	rs550621	0	550621	intergenic_variant	1	NR	5e-15	14.301		NA		NR [~ 8900000] (imputed)	N	heel bone mineral density	http://www.ebi.ac.uk/efo/EFO_0009270	GCST007066	Genome-wide genotyping array	5e-15
2019-02-08	30595370	Kichaev G	2018-12-27	Am J Hum Genet	www.ncbi.nlm.nih.gov/pubmed/30595370	Leveraging Polygenic Functional Enrichment to Improve GWAS Power.	Heel bone mineral density	approximately 446,000 European ancestry individuals	NA	8q24.12	8	120049640		DEPTOR	DEPTOR			ENSG00000155792	NA	NA	rs4871827-?	rs4871827	0	4871827	missense_variant	0	NR	2e-10	9.69897		NA		NR [~ 8900000] (imputed)	N	heel bone mineral density	http://www.ebi.ac.uk/efo/EFO_0009270	GCST007066	Genome-wide genotyping array	2e-10
							Figure 1 - Source Data 1: MMnet GWAS hits and their association with heel bone mineral density
							GWAS mapped genes: Gene(s) mapped to the strongest SNP in the GWAS. If the SNP is located within a gene, that gene is listed. If the SNP is located within multiple genes, these genes are listed separated by commas. If the SNP is intergenic, the upstream and downstream genes are listed, separated by a hyphen.
							RISK ALLELE FREQUENCY: Reported risk/effect allele frequency associated with strongest SNP in controls (if not available among all controls, among the control group with the largest sample size). If the associated locus is a haplotype the haplotype frequency will be extracted.
							P-VALUE MLOG: -log(p-value)
							OR or BETA: Reported odds ratio or beta-coefficient associated with strongest SNP risk allele in the GWAS. Note that if an OR <1 is reported this is inverted, along with the reported allele, so that all ORs included in the Catalog are >1. Appropriate unit and increase/decrease are included for beta coefficients.
							95% CI: Reported 95% confidence interval associated with strongest SNP risk allele, along with unit in the case of beta-coefficients. If 95% CIs are not published, the range reflects the estimates using the standard error, where available.
