# Supplementary material for: A trans-eQTL network regulates osteoclast multinucleation and bone mass
Source: eLife. 2020 Jun 19;9:e55549. doi: 10.7554/eLife.55549 (PMC7351491; doi:10.7554/eLife.55549)
Supplement: Figure 3—source data 1. [file elife-55549-fig3-data1.xlsx]

## Sheet: Sheet1
Figure 3 – Source Data 1. Results of high-throughput MMnet mouse knockout skeletal phenotyping.
				FEMUR															VERTEBRAE
						TRABECULAR				CORTICAL			3-POINT BENDING								COMPRESSION
				BMC	LENGTH	BV/TV	Tb.N	Tb.Th	Tb.Sp	Ct.Th	Int.Di	Ct.BMD	YIELD LOAD	MAX LOAD	FRACTURE LOAD	STIFFNESS	DE #		BMC	LENGTH	YIELD LOAD	MAX LOAD	STIFFNESS
				(Grey level)	(mm)	%	(mm-1)	(mm)	(mm)	(mm)	(mm)	(mg HA/cm3)	(N)	(N)	(N)	(N/mm)	(%)		(Grey level)	(mm)	(N)	(N)	(N/mm)
			MEAN	177.037	15.0865	0.0831406	3.21464	0.0537981	0.307388	0.187547	0.817748	1014.68	11.8877	19.3379	13.7921	109.611	0.754449		168.791	3.95469	60.9138	76.9713	318.701
			-2SD	170.463	14.4763	0.0526488	2.72175	0.0448864	0.254397	0.171435	0.717542	935.311	8.6184	15.682	5.48688	82.3781	0.362638		161.628	3.76348	45.4327	60.4284	237.645
Gene	Genotype	n	+2SD	183.612	15.6967	0.113632	3.70753	0.0627099	0.360379	0.203659	0.917954	1094.04	15.157	22.9938	22.0973	136.845	1.14626		175.953	4.1459	76.3948	93.5142	399.756
Appl2	HOM	2		172.5	14.56	0.1226	3.61255	0.05765	0.2669	0.173	0.92605	1011.23	10.1925	17.9258	12.4914	109.823	0.809159		164.5	3.85425	53.9481	62.5158	279.294
Atp8b2	HET	2		177	15.2815	0.1154	3.4947	0.05335	0.278	0.19865	0.7541	1060.1	13.033	18.583	16.476	80.2895	0.57805		173	4.02525	69.7825	86.6745	344.775
Deptor	HOM	6		174.667	15.0303	0.0413333	2.17343	0.05085	0.49015	0.184133	0.7922	1022.94	12.3141	17.8138	18.069	111.156	0.40958		164.75	3.92	53.5749	69.3048	223.414
Dot1l	HET	5		179.6	15.302	0.09104	2.95928	0.06132	0.3392	0.18638	0.88478	991.916	10.7889	19.1438	12.5349	109.707	0.877574		166.5	4.0473	60.4878	77.9459	333.322
Egfr	HET	2		175.5	15.0735	0.06905	2.8617	0.0611	0.3475	0.1835	0.84265	997.957	14.8769	18.1326	13.8464	107.216	0.773979		163.5	3.8835	55.9705	71.808	317.754
Eml1	HOM	6		176	15.3132	0.0835	3.141	0.0549333	0.317317	0.188267	0.770733	1017.11	11.6794	17.0828	11.4057	99.1881	0.822672		164.417	3.96617	51.8019	62.8776	233.149
Eps15	HOM	2		178	14.579	0.09995	3.4188	0.05875	0.28255	0.19205	0.82775	1032.58	10.0182	19.6462	12.2168	117.621	0.882425		164	4.009	64.8735	75.725	340.453
Igsf8	HOM	6		176.5	14.1807	0.0627	3.10242	0.0471833	0.319233	0.1852	0.798967	1026.47	12.9349	19.4204	14.439	118.157	0.72465		171.75	3.8615	70.8501	87.2932	327.237
Pik3cb	HOM	2		181	14.5315	0.13985	4.2377	0.0553	0.2229	0.19195	0.81195	992.931	11.0994	19.7394	15.4952	115.822	0.707997		169.5	3.855	64.0418	75.2208	357.446
Rnf125	HOM	6		175.167	15.4637	0.08785	3.3483	0.0510667	0.29815	0.195983	0.77	1048.3	13.7098	18.395	14.1592	95.8893	0.716791		168.667	3.9555	59.1805	75.7463	281.182
Slc1a4	HOM	2		177	15.4255	0.0907	3.3321	0.05405	0.28905	0.19545	0.74485	995.006	13.1813	18.1394	14.9506	96.2038	0.594403		173.5	4.04125	70.8545	87.886	302.437
Tgfb1i1	HOM	2		171.5	14.7195	0.0628	3.11665	0.0532	0.32255	0.17355	0.77065	962.321	8.91092	15.8061	6.97145	100.389	0.945521		169	3.9235	62.2318	75.4795	315.839
