# Supplementary material for: A trans-eQTL network regulates osteoclast multinucleation and bone mass
Source: eLife. 2020 Jun 19;9:e55549. doi: 10.7554/eLife.55549 (PMC7351491; doi:10.7554/eLife.55549)
Supplement: Figure 5—source data 1. [file elife-55549-fig5-data1.xlsx]

## Sheet: all genes
Gene
Abca1
ACAP1
ACOD1
ADCY7
ALCAM
ALOX12E
ANKRD34C
AP1S3
APPL2
ASAP2
ATP1A3
ATP8B2
BCAR3
BCAT1
BCL6B
BEND6
BTBD19
C1QC
CARS
CCND2
CCR1
CCRN4L
CD163
CD4
CD9
CDK2AP1
CDR2
CLDN4
CLEC4A1
CLEC4A3
CLIC2
CLIC4
CLIC5
CORO1A
CPM
CTSC
CTSK
CYP2J2
DCSTAMP
DEPTOR
DHRS9
DMD
DNAJC18
DOK5
DOT1L
DST
DUSP2
DUSP8
EFR3B
EGFR
EML1
EPS15
ERC2
F3
FABP4
FADS1
FAIM3
FAM129B
FAM20C
FCGRT
FCHSD2
FGR
FHOD1
FLI1
FLNA
FLT1
FN1
FOXP4
GALNT6
GGTA1P
GPR165
HACD4
HIVEP3
HK3
HMGN3
HPSE
HR
HSPA4L
HSPH1
HTR2B
IDUA
IFRD2
IGF2BP2
IGSF8
IL1RN
IQGAP2
ITGAX
ITPR3
JUP
KCNN4
KDELR3
LAT2
LIPG
LPCAT2
LRRK2
MALT1
MANBA
MAP7
MAPKAPK3
MCTP2
MET
MMP9
MPZL3
MRC1
MS4A6A
MYO1D
MYOF
NCR2
NKAIN1
NPL
NXPE1
OARD1
OCSTAMP
OLR1
OSBPL11
P2RX7
PDGFC
PFKP
PIGT
PIK3CB
PIK3IP1
PLCD1
PNRC2
PSD3
PSD4
RAB27A
RAB7B
RAI14
RASSF8
RDH10
REEP4
RGL1
RNF125
RNF141
SELENOP
SERPINB2
SFRP5
SLAMF6
SLC13A1
SLC16A3
SLC1A4
SLC1A5
SLC22A23
SLC26A11
SLC2A1
SLC2A6
SLC39A10
SLC40A1
SLC44A2
SLC52A3
SLC7A1
SLCO4A1
SPART
SPATA13
SPN
SPP1
STK36
TBC1D4
TGFB1I1
TGM2
THEM6
TIMD2
TLR7
TMBIM1
TMEM26
TNS1
TRIM55
TSPAN13
TSPAN7
UGCG
ULK2
USP31
VOPP1
WDR26
WDR62
WFS1
ZBTB33
ZNF334

## Sheet: Criteria 1
EXPRESSION IN HUMAN OSTEOCLASTS IS > 100 READS (reference: in house RNA sequencing on human primary osteoclasts from PBMCs)
Gene	Gene name	Human osteoclast expression	Human OC (read count)
MMP9	Matrix metallopeptidase 9	Y	1.55117e+06
CTSK	Cathepsin K	Y	1.48467e+06
SPP1	Secreted Phosphoprotein 1	Y	1.0527e+06
FN1	Fibronectin 1	Y	176508
FLNA	Filamin A, alpha	Y	101440
ITGAX	Integrin, alpha X	Y	87220.9
MYO1D	Myosin ID	Y	46799.8
CD4	CD4 antigen	Y	31223.2
CD163	CD163 Molecule	Y	27299.8
MYOF	Myoferlin	Y	25890.3
FAM129B	Family With Sequence Similarity 129 Member B	Y	25125
BCAT1	branched chain amino-acid transaminase 1, cytosolic	Y	23605.2
CD9	CD9 molecule	Y	23135
DCSTAMP	Dendrocyte Expressed Seven Transmembrane Protein	Y	19835.7
SLC16A3	Solute carrier family 16 member 3	Y	18374.8
FAM20C	Family With Sequence Similarity 20 Member C	Y	16678.3
CCR1	Chemokine (C-C motif) receptor 1	Y	15802
LAT2	Linker for activation of T cells family, member 2	Y	13794.8
MRC1	Mannose receptor, C type 1	Y	13692.5
PFKP	Phosphofructokinase, platelet	Y	13403.6
HK3	Hexokinase 3 (white cell)	Y	12804.1
NPL	N-acetylneuraminate pyruvate lyase	Y	12024.6
TGM2	Transglutaminase 2	Y	11662.6
FCGRT	Fc fragment of IgG, receptor, transporter, alpha	Y	11491.6
FGR	SRC family kinase Fgr (or SRC2)	Y	11288.1
TMBIM1	transmembrane BAX inhibitor motif containing 1	Y	10525.4
WDR26	WD Repeat Domain 26	Y	10502.6
PIK3CB	Phosphatidylinositol-4,5-Bisphosphate 3-Kinase Catalytic Subunit Beta	Y	9566.12
ABCA1	ATP Binding Cassette Subfamily A Member 1	Y	9450.7
CTSC	Cathepsin C	Y	8853.69
FADS1	Fatty Acid Desaturase 1	Y	8405.75
IL1RN	Interleukin 1 receptor antagonist	Y	8209.14
SLC1A5	Solute carrier family 1 (neutral amino acid transporter), member 5	Y	8175.83
ALCAM	Activated leukocyte cell adhesion molecule	Y	7867.26
CLIC4	Chloride intracellular channel 4	Y	7761.92
MAPKAPK3	Mitogen-Activated Protein Kinase-Activated Protein Kinase 3	Y	7314.87
SLC26A11	Solute Carrier Family 26 Member 11	Y	7052.12
HSPH1	Heat shock 105kDa/110kDa protein 1	Y	6880.76
GALNT6	UDP-N-acetyl-alpha-D-galactosamine:polypeptide N-acetylgalactosaminyltransferase 6	Y	6853.93
DUSP2	Dual specificity phosphatase 2	Y	6728.4
MANBA	Mannosidase Beta	Y	6292.31
SLCO4A1	Solute carrier organic anion transporter family, member 4A1	Y	5973.36
TNS1	Tensin 1	Y	5381.94
PNRC2	Proline-rich nuclear receptor coactivator 2	Y	5187.56
DOT1L	DOT1 Like Histone H3K79 Methyltransferase	Y	5115.72
IQGAP2	IQ motif containing GTPase activating protein 2	Y	5099.23
SELENOP	Selenoprotein P	Y	5061.78
ADCY7	Adenylate cyclase 7	Y	4953.27
VOPP1	Vesicular, overexpressed in cancer, prosurvival protein 1	Y	4908.03
RAB7B	RAB7, member RAS oncogene family-like 1	Y	4837.02
RAI14	Retinoic acid induced 14	Y	4794.41
PIGT	Phosphatidylinositol glycan anchor biosynthesis, class T	Y	4594.53
SLAMF6	SLAM family member 6	Y	4572.07
CPM	Carboxypeptidase M	Y	4438.51
KCNN4	Potassium conductance calcium-activated channel, subfamily N, member 4	Y	4315.73
RGL1	Ral Guanine Nucleotide Dissociation Stimulator Like 1	Y	4036.38
SLC1A4	Solute Carrier Family 1 Member 4	Y	3724.42
SLC7A1	Solute Carrier Family 7 Member 1	Y	3400.66
OSBPL11	Oxysterol binding protein-like 11	Y	3258.9
CARS	Cysteinyl-tRNA synthetase	Y	3092.11
PSD4	Pleckstrin and Sec7 domain containing 4	Y	3000.81
SLC44A2	Solute carrier family 44 member 2	Y	2935.14
SPART	Spastic Paraplegia 20	Y	2892.37
EPS15	Epidermal Growth Factor Receptor Pathway Substrate 15	Y	2821.1
APPL2	Adaptor Protein, Phosphotyrosine Interacting With PH Domain And Leucine Zipper 2	Y	2470.03
LRRK2	Leucine Rich Repeat Kinase 2	Y	2428.19
F3	Coagulation factor III	Y	2379.71
OCSTAMP	Transmembrane 4 L six family member 19	Y	2375.97
FCHSD2	FCH and double SH3 domains 2	Y	2345.55
DHRS9	Dehydrogenase/reductase member 9	Y	2172.38
OLR1	Oxidized low density lipoprotein receptor 1	Y	2113.67
HIVEP3	Human immunodeficiency virus type I enhancer binding protein 3	Y	2059.94
LPCAT2	Lysophosphatidylcholine Acyltransferase 2	Y	1821.57
C1QC	Complement Component 1, Q Subcomponent, C Chain	Y	1819.4
UGCG	UDP-Glucose Ceramide Glucosyltransferase	Y	1816.38
RAB27A	RAB27A, Member RAS Oncogene Family	Y	1814.92
MET	Met proto-oncogene	Y	1803.93
PSD3	Pleckstrin and Sec7 domain containing 3	Y	1783.53
MALT1	Mucosa associated lymphoid tissue lymphoma translocation gene 1	Y	1747.82
HMGN3	High mobility group nucleosomal binding domain 3	Y	1662.51
IGF2BP2	Insulin-like growth factor 2 mRNA binding protein 2	Y	1467.42
FLI1	Fli-1 proto-oncogene, ETS transcription factor	Y	1380.09
CORO1A	coronin, actin binding protein, 1A	Y	1376.41
FHOD1	Formin Homology 2 Domain Containing 1	Y	1334.43
PIK3IP1	Phosphoinositide-3-kinase interacting protein 1	Y	1213.21
RNF141	Ring Finger Protein 141	Y	1138.78
IFRD2	Interferon Related Developmental Regulator 2	Y	1012.96
ZBTB33	Zinc Finger And BTB Domain Containing 33	Y	1009.28
FOXP4	Forkhead box P4	Y	989.844
EFR3B	EFR3 homolog B	Y	955.508
MPZL3	Myelin protein zero-like 3	Y	935.172
IGSF8	Immunoglobulin Superfamily Member 8	Y	933.709
STK36	Serine/Threonine Kinase 36	Y	852.291
WFS1	Wolfram syndrome 1	Y	847.049
SLC39A10	Solute carrier family 39 (zinc transporter), member 10	Y	810.855
SERPINB2	Serpin Family B Member 2	Y	797.749
ULK2	Unc-51 like autophagy activating kinase 2	Y	746.108
TSPAN13	Tetraspanin 13	Y	720.868
OARD1	O-acyl-ADP-ribose deacylase 1	Y	696.547
CDR2	Cerebellar Degeneration Related Protein 2	Y	675.96
P2RX7	Purinergic receptor P2X, ligand-gated ion channel, 7	Y	668.029
IDUA	Iduronidase, Alpha-L	Y	575.856
REEP4	Receptor Accessory Protein 4	Y	552.248
AP1S3	Adaptor-related protein complex 1, sigma 3 subunit	Y	543.798
THEM6	Thioesterase superfamily member 6	Y	529.961
BTBD19	BTB (POZ) domain containing 19	Y	527.218
ACAP1	ArfGAP With Coiled-Coil, Ankyrin Repeat And PH Domains 1	Y	487.595
CDK2AP1	Cyclin-dependent kinase 2 associated protein 1	Y	482.07
CLIC2	Chloride intracellular channel 2	Y	477.169
SLC2A6	Solute carrier family 2	Y	461.441
PLCD1	Phospholipase C Delta 1	Y	437.72
SLC40A1	Solute Carrier Family 40 Member 1 (Ferroportin 1)	Y	414.948
PDGFC	Platelet Derived Growth Factor C	Y	402.797
USP31	Ubiquitin specific peptidase 31	Y	379.387
MS4A6A	membrane-spanning 4-domains, subfamily A, member 6A	Y	344.709
DEPTOR	DEP Domain Containing MTOR-Interacting Protein	Y	330.474
ATP8B2	ATPase Phospholipid Transporting 8B2	Y	301.5
DNAJC18	DnaJ (Hsp40) homolog, subfamily C, member 18	Y	291.662
RDH10	Retinol Dehydrogenase 10	Y	282.386
JUP	Junction Plakoglobin	Y	227.84
SLC22A23	Solute carrier family 22, member 23	Y	221.271
SPN	Sialophorin	Y	207.597
MAP7	microtubule-associated protein 7	Y	194.814
HACD4	3-Hydroxyacyl-CoA Dehydratase 4	Y	188.794
HPSE	heparanase	Y	163.578
FLT1	Fms-related tyrosine kinase 1	Y	163.224
ASAP2	ArfGAP with SH3 domain, ankyrin repeat and PH domain 2	Y	124.337
RNF125	Ring Finger Protein 125, E3 Ubiquitin Protein Ligase	Y	113.051
EML1	Echinoderm microtubule associated protein like 1	Y	105.954
EGFR	Epidermal Growth Factor Receptor	Y	102

## Sheet: Criteria 2
GENE EXPRESSION IN MOUSE MACROPHAGES (reference: in house RNA sequencing on murine bone marrow derived primary macrophages)
Gene	Gene name	Human osteoclast expression	Human OC (read count)	Mouse macrophage expression	Mouse MAC (FPKM)
MMP9	Matrix metallopeptidase 9	Y	1.55117e+06	Y	2.76306
CTSK	Cathepsin K	Y	1.48467e+06	Y	6.54389
SPP1	Secreted Phosphoprotein 1	Y	1.0527e+06	Y	397.01
FN1	Fibronectin 1	Y	176508	Y	15.4829
FLNA	Filamin A, alpha	Y	101440	Y	130.678
ITGAX	Integrin, alpha X	Y	87220.9	Y	8.30292
MYO1D	Myosin ID	Y	46799.8	Y	3.78863
CD163	CD163 Molecule	Y	27299.8	Y	1
MYOF	Myoferlin	Y	25890.3	Y	26.3067
FAM129B	Family With Sequence Similarity 129 Member B	Y	25125	Y	203.752
BCAT1	branched chain amino-acid transaminase 1, cytosolic	Y	23605.2	Y	13.3198
CD9	CD9 molecule	Y	23135	Y	315.62
DCSTAMP	Dendrocyte Expressed Seven Transmembrane Protein	Y	19835.7	Y	5.69349
SLC16A3	Solute carrier family 16 member 3	Y	18374.8	Y	82.2535
FAM20C	Family With Sequence Similarity 20 Member C	Y	16678.3	Y	107.252
CCR1	Chemokine (C-C motif) receptor 1	Y	15802	Y	60.2633
LAT2	Linker for activation of T cells family, member 2	Y	13794.8	Y	162.203
PFKP	Phosphofructokinase, platelet	Y	13403.6	Y	54.6736
HK3	Hexokinase 3 (white cell)	Y	12804.1	Y	137.533
NPL	N-acetylneuraminate pyruvate lyase	Y	12024.6	Y	30.0417
TGM2	Transglutaminase 2	Y	11662.6	Y	119.559
FCGRT	Fc fragment of IgG, receptor, transporter, alpha	Y	11491.6	Y	11.2525
FGR	SRC family kinase Fgr (or SRC2)	Y	11288.1	Y	2.89774
TMBIM1	transmembrane BAX inhibitor motif containing 1	Y	10525.4	Y	43.2654
WDR26	WD Repeat Domain 26	Y	10502.6	Y	55.2275
PIK3CB	Phosphatidylinositol-4,5-Bisphosphate 3-Kinase Catalytic Subunit Beta	Y	9566.12	Y	12.2933
ABCA1	ATP Binding Cassette Subfamily A Member 1	Y	9450.7	Y	4.36985
CTSC	Cathepsin C	Y	8853.69	Y	120.501
FADS1	Fatty Acid Desaturase 1	Y	8405.75	Y	29.2826
IL1RN	Interleukin 1 receptor antagonist	Y	8209.14	Y	17.9151
SLC1A5	Solute carrier family 1 (neutral amino acid transporter), member 5	Y	8175.83	Y	18.7043
ALCAM	Activated leukocyte cell adhesion molecule	Y	7867.26	Y	94.793
CLIC4	Chloride intracellular channel 4	Y	7761.92	Y	37.4951
MAPKAPK3	Mitogen-Activated Protein Kinase-Activated Protein Kinase 3	Y	7314.87	Y	14.5859
SLC26A11	Solute Carrier Family 26 Member 11	Y	7052.12	Y	6.60333
HSPH1	Heat shock 105kDa/110kDa protein 1	Y	6880.76	Y	13.8522
GALNT6	UDP-N-acetyl-alpha-D-galactosamine:polypeptide N-acetylgalactosaminyltransferase 6	Y	6853.93	Y	37.7209
DUSP2	Dual specificity phosphatase 2	Y	6728.4	Y	1.57798
MANBA	Mannosidase Beta	Y	6292.31	Y	16.6944
SLCO4A1	Solute carrier organic anion transporter family, member 4A1	Y	5973.36	Y	5.00313
TNS1	Tensin 1	Y	5381.94	Y	6.15462
PNRC2	Proline-rich nuclear receptor coactivator 2	Y	5187.56	Y	41.7075
DOT1L	DOT1 Like Histone H3K79 Methyltransferase	Y	5115.72		11.5833
IQGAP2	IQ motif containing GTPase activating protein 2	Y	5099.23	Y	4.93027
SELENOP	Selenoprotein P	Y	5061.78	Y	233.381
ADCY7	Adenylate cyclase 7	Y	4953.27	Y	38.7476
VOPP1	Vesicular, overexpressed in cancer, prosurvival protein 1	Y	4908.03	Y	13.3839
RAB7B	RAB7, member RAS oncogene family-like 1	Y	4837.02	Y	273.603
RAI14	Retinoic acid induced 14	Y	4794.41	Y	7.63114
PIGT	Phosphatidylinositol glycan anchor biosynthesis, class T	Y	4594.53	Y	37.0909
KCNN4	Potassium conductance calcium-activated channel, subfamily N, member 4	Y	4315.73	Y	165.054
RGL1	Ral Guanine Nucleotide Dissociation Stimulator Like 1	Y	4036.38	Y	7.30638
SLC1A4	Solute Carrier Family 1 Member 4	Y	3724.42	Y	2
SLC7A1	Solute Carrier Family 7 Member 1	Y	3400.66	Y	3.72033
OSBPL11	Oxysterol binding protein-like 11	Y	3258.9	Y	10.5764
CARS	Cysteinyl-tRNA synthetase	Y	3092.11	Y	24.041
PSD4	Pleckstrin and Sec7 domain containing 4	Y	3000.81	Y	28.9211
SLC44A2	Solute carrier family 44 member 2	Y	2935.14	Y	27.9235
SPART	Spastic Paraplegia 20	Y	2892.37	Y	8.74196
EPS15	Epidermal Growth Factor Receptor Pathway Substrate 15	Y	2821.1	Y	18.407
APPL2	Adaptor Protein, Phosphotyrosine Interacting With PH Domain And Leucine Zipper 2	Y	2470.03	Y	25.2805
OCSTAMP	Transmembrane 4 L six family member 19	Y	2375.97	Y	2.89684
DHRS9	Dehydrogenase/reductase member 9	Y	2172.38	Y	3.5181
LPCAT2	Lysophosphatidylcholine Acyltransferase 2	Y	1821.57	Y	4.60572
C1QC	Complement Component 1, Q Subcomponent, C Chain	Y	1819.4	Y	229.706
UGCG	UDP-Glucose Ceramide Glucosyltransferase	Y	1816.38	Y	9.26313
MALT1	Mucosa associated lymphoid tissue lymphoma translocation gene 1	Y	1747.82	Y	6.0344
HMGN3	High mobility group nucleosomal binding domain 3	Y	1662.51	Y	4.99497
IGF2BP2	Insulin-like growth factor 2 mRNA binding protein 2	Y	1467.42	Y	5.30063
FLI1	Fli-1 proto-oncogene, ETS transcription factor	Y	1380.09	Y	21.4507
CORO1A	coronin, actin binding protein, 1A	Y	1376.41	Y	235.692
FHOD1	Formin Homology 2 Domain Containing 1	Y	1334.43	Y	14.1357
PIK3IP1	Phosphoinositide-3-kinase interacting protein 1	Y	1213.21	Y	1.19039
RNF141	Ring Finger Protein 141	Y	1138.78	Y	13.439
IFRD2	Interferon Related Developmental Regulator 2	Y	1012.96	Y	7.10845
ZBTB33	Zinc Finger And BTB Domain Containing 33	Y	1009.28	Y	5.07871
FOXP4	Forkhead box P4	Y	989.844	Y	5.58617
IGSF8	Immunoglobulin Superfamily Member 8	Y	933.709	Y	33.8021
WFS1	Wolfram syndrome 1	Y	847.049	Y	2.29705
SLC39A10	Solute carrier family 39 (zinc transporter), member 10	Y	810.855	Y	3.62355
SERPINB2	Serpin Family B Member 2	Y	797.749	Y	10
ULK2	Unc-51 like autophagy activating kinase 2	Y	746.108	Y	7.78967
TSPAN13	Tetraspanin 13	Y	720.868	Y	5.65548
CDR2	Cerebellar Degeneration Related Protein 2	Y	675.96	y	5.94205
P2RX7	Purinergic receptor P2X, ligand-gated ion channel, 7	Y	668.029	Y	9.55588
IDUA	Iduronidase, Alpha-L	Y	575.856	Y	9.06649
REEP4	Receptor Accessory Protein 4	Y	552.248	Y	33.3079
AP1S3	Adaptor-related protein complex 1, sigma 3 subunit	Y	543.798	Y	3.81675
BTBD19	BTB (POZ) domain containing 19	Y	527.218	Y	3.09525
ACAP1	ArfGAP With Coiled-Coil, Ankyrin Repeat And PH Domains 1	Y	487.595	Y	7
CDK2AP1	Cyclin-dependent kinase 2 associated protein 1	Y	482.07	Y	19.6472
SLC2A6	Solute carrier family 2	Y	461.441	Y	21.2744
SLC40A1	Solute Carrier Family 40 Member 1 (Ferroportin 1)	Y	414.948	Y	22.9214
USP31	Ubiquitin specific peptidase 31	Y	379.387	Y	2
MS4A6A	membrane-spanning 4-domains, subfamily A, member 6A	Y	344.709	Y	74.4891
DEPTOR	DEP Domain Containing MTOR-Interacting Protein	Y	330.474	Y	7.72593
ATP8B2	ATPase Phospholipid Transporting 8B2	Y	301.5	Y	9.50126
DNAJC18	DnaJ (Hsp40) homolog, subfamily C, member 18	Y	291.662	Y	5.80855
RDH10	Retinol Dehydrogenase 10	Y	282.386	Y	2
JUP	Junction Plakoglobin	Y	227.84	Y	2.29549
SPN	Sialophorin	Y	207.597	Y	20.439
MAP7	microtubule-associated protein 7	Y	194.814	Y	50
HPSE	heparanase	Y	163.578	Y	84.9077
RNF125	Ring Finger Protein 125, E3 Ubiquitin Protein Ligase	Y	113.051	Y	12.4252
EML1	Echinoderm microtubule associated protein like 1	Y	105.954	Y	16
EGFR	Epidermal Growth Factor Receptor	Y	102	Y	24

## Sheet: Criteria 3
GENE FUNCTION IN OSTEOCLASTOGENESIS IS UNKNOWN (reference: publications in pubmed, accessed in December 2017)
Gene	Gene name	Human osteoclast expression	Human OC (read count)	Mouse macrophage expression	Mouse MAC (FPKM)	Known function in osteoclasts
MYO1D	Myosin ID	Y	46799.8	Y	3.78863	N
CD163	CD163 Molecule	Y	27299.8	Y	1	N
MYOF	Myoferlin	Y	25890.3	Y	26.3067	N
FAM129B	Family With Sequence Similarity 129 Member B	Y	25125	Y	203.752	N
BCAT1	branched chain amino-acid transaminase 1, cytosolic	Y	23605.2	Y	13.3198	N
SLC16A3	Solute carrier family 16 member 3	Y	18374.8	Y	82.2535	N
FAM20C	Family With Sequence Similarity 20 Member C	Y	16678.3	Y	107.252	N
LAT2	Linker for activation of T cells family, member 2	Y	13794.8	Y	162.203	N
PFKP	Phosphofructokinase, platelet	Y	13403.6	Y	54.6736	N
HK3	Hexokinase 3 (white cell)	Y	12804.1	Y	137.533	N
NPL	N-acetylneuraminate pyruvate lyase	Y	12024.6	Y	30.0417	N
TGM2	Transglutaminase 2	Y	11662.6	Y	119.559	N
FCGRT	Fc fragment of IgG, receptor, transporter, alpha	Y	11491.6	Y	11.2525	N
FGR	SRC family kinase Fgr (or SRC2)	Y	11288.1	Y	2.89774	N
TMBIM1	transmembrane BAX inhibitor motif containing 1	Y	10525.4	Y	43.2654	N
WDR26	WD Repeat Domain 26	Y	10502.6	Y	55.2275	N
ABCA1	ATP Binding Cassette Subfamily A Member 1	Y	9450.7	Y	4.36985	N
CTSC	Cathepsin C	Y	8853.69	Y	120.501	N
FADS1	Fatty Acid Desaturase 1	Y	8405.75	Y	29.2826	N
SLC1A5	Solute carrier family 1 (neutral amino acid transporter), member 5	Y	8175.83	Y	18.7043	N
ALCAM	Activated leukocyte cell adhesion molecule	Y	7867.26	Y	94.793	N
CLIC4	Chloride intracellular channel 4	Y	7761.92	Y	37.4951	N
MAPKAPK3	Mitogen-Activated Protein Kinase-Activated Protein Kinase 3	Y	7314.87	Y	14.5859	N
SLC26A11	Solute Carrier Family 26 Member 11	Y	7052.12	Y	6.60333	N
HSPH1	Heat shock 105kDa/110kDa protein 1	Y	6880.76	Y	13.8522	N
GALNT6	UDP-N-acetyl-alpha-D-galactosamine:polypeptide N-acetylgalactosaminyltransferase 6	Y	6853.93	Y	37.7209	N
DUSP2	Dual specificity phosphatase 2	Y	6728.4	Y	1.57798	N
MANBA	Mannosidase Beta	Y	6292.31	Y	16.6944	N
SLCO4A1	Solute carrier organic anion transporter family, member 4A1	Y	5973.36	Y	5.00313	N
TNS1	Tensin 1	Y	5381.94	Y	6.15462	N
PNRC2	Proline-rich nuclear receptor coactivator 2	Y	5187.56	Y	41.7075	N
DOT1L	DOT1 Like Histone H3K79 Methyltransferase	Y	5115.72		11.5833	N
IQGAP2	IQ motif containing GTPase activating protein 2	Y	5099.23	Y	4.93027	N
SELENOP	Selenoprotein P	Y	5061.78	Y	233.381	N
ADCY7	Adenylate cyclase 7	Y	4953.27	Y	38.7476	N
VOPP1	Vesicular, overexpressed in cancer, prosurvival protein 1	Y	4908.03	Y	13.3839	N
RAB7B	RAB7, member RAS oncogene family-like 1	Y	4837.02	Y	273.603	N
RAI14	Retinoic acid induced 14	Y	4794.41	Y	7.63114	N
PIGT	Phosphatidylinositol glycan anchor biosynthesis, class T	Y	4594.53	Y	37.0909	N
RGL1	Ral Guanine Nucleotide Dissociation Stimulator Like 1	Y	4036.38	Y	7.30638	N
SLC1A4	Solute Carrier Family 1 Member 4	Y	3724.42	Y	2	N
SLC7A1	Solute Carrier Family 7 Member 1	Y	3400.66	Y	3.72033	N
OSBPL11	Oxysterol binding protein-like 11	Y	3258.9	Y	10.5764	N
CARS	Cysteinyl-tRNA synthetase	Y	3092.11	Y	24.041	N
PSD4	Pleckstrin and Sec7 domain containing 4	Y	3000.81	Y	28.9211	N
SLC44A2	Solute carrier family 44 member 2	Y	2935.14	Y	27.9235	N
SPART	Spastic Paraplegia 20	Y	2892.37	Y	8.74196	N
EPS15	Epidermal Growth Factor Receptor Pathway Substrate 15	Y	2821.1	Y	18.407	N
APPL2	Adaptor Protein, Phosphotyrosine Interacting With PH Domain And Leucine Zipper 2	Y	2470.03	Y	25.2805	N
DHRS9	Dehydrogenase/reductase member 9	Y	2172.38	Y	3.5181	N
LPCAT2	Lysophosphatidylcholine Acyltransferase 2	Y	1821.57	Y	4.60572	N
C1QC	Complement Component 1, Q Subcomponent, C Chain	Y	1819.4	Y	229.706	N
HMGN3	High mobility group nucleosomal binding domain 3	Y	1662.51	Y	4.99497	N
IGF2BP2	Insulin-like growth factor 2 mRNA binding protein 2	Y	1467.42	Y	5.30063	N
FLI1	Fli-1 proto-oncogene, ETS transcription factor	Y	1380.09	Y	21.4507	N
CORO1A	coronin, actin binding protein, 1A	Y	1376.41	Y	235.692	N
FHOD1	Formin Homology 2 Domain Containing 1	Y	1334.43	Y	14.1357	N
PIK3IP1	Phosphoinositide-3-kinase interacting protein 1	Y	1213.21	Y	1.19039	N
RNF141	Ring Finger Protein 141	Y	1138.78	Y	13.439	N
IFRD2	Interferon Related Developmental Regulator 2	Y	1012.96	Y	7.10845	N
ZBTB33	Zinc Finger And BTB Domain Containing 33	Y	1009.28	Y	5.07871	N
FOXP4	Forkhead box P4	Y	989.844	Y	5.58617	N
IGSF8	Immunoglobulin Superfamily Member 8	Y	933.709	Y	33.8021	N
WFS1	Wolfram syndrome 1	Y	847.049	Y	2.29705	N
SLC39A10	Solute carrier family 39 (zinc transporter), member 10	Y	810.855	Y	3.62355	N
SERPINB2	Serpin Family B Member 2	Y	797.749	Y	10	N
ULK2	Unc-51 like autophagy activating kinase 2	Y	746.108	Y	7.78967	N
CDR2	Cerebellar Degeneration Related Protein 2	Y	675.96	y	5.94205	N
REEP4	Receptor Accessory Protein 4	Y	552.248	Y	33.3079	N
AP1S3	Adaptor-related protein complex 1, sigma 3 subunit	Y	543.798	Y	3.81675	N
BTBD19	BTB (POZ) domain containing 19	Y	527.218	Y	3.09525	N
ACAP1	ArfGAP With Coiled-Coil, Ankyrin Repeat And PH Domains 1	Y	487.595	Y	7	N
CDK2AP1	Cyclin-dependent kinase 2 associated protein 1	Y	482.07	Y	19.6472	N
SLC2A6	Solute carrier family 2	Y	461.441	Y	21.2744	N
SLC40A1	Solute Carrier Family 40 Member 1 (Ferroportin 1)	Y	414.948	Y	22.9214	N
USP31	Ubiquitin specific peptidase 31	Y	379.387	Y	2	N
MS4A6A	membrane-spanning 4-domains, subfamily A, member 6A	Y	344.709	Y	74.4891	N
DEPTOR	DEP Domain Containing MTOR-Interacting Protein	Y	330.474	Y	7.72593	N
ATP8B2	ATPase Phospholipid Transporting 8B2	Y	301.5	Y	9.50126	N
DNAJC18	DnaJ (Hsp40) homolog, subfamily C, member 18	Y	291.662	Y	5.80855	N
RDH10	Retinol Dehydrogenase 10	Y	282.386	Y	2	N
JUP	Junction Plakoglobin	Y	227.84	Y	2.29549	N
MAP7	microtubule-associated protein 7	Y	194.814	Y	50	N
HPSE	heparanase	Y	163.578	Y	84.9077	N
RNF125	Ring Finger Protein 125, E3 Ubiquitin Protein Ligase	Y	113.051	Y	12.4252	N
EML1	Echinoderm microtubule associated protein like 1	Y	105.954	Y	16	N
EGFR	Epidermal Growth Factor Receptor	Y	102	Y	24	N

## Sheet: Criteria 4
MOUSE MODEL IS AVAILABLE (reference: International Mouse Strain Resource)
Gene	Gene name	Human osteoclast expression	Human OC (read count)	Mouse macrophage expression	Mouse MAC (FPKM)	Known function in osteoclasts	Mouse model available
MYO1D	Myosin ID	Y	46799.8	Y	3.78863	N	Y
CD163	CD163 Molecule	Y	27299.8	Y	1	N	Y
MYOF	Myoferlin	Y	25890.3	Y	26.3067	N	Y
BCAT1	branched chain amino-acid transaminase 1, cytosolic	Y	23605.2	Y	13.3198	N	Y
SLC16A3	Solute carrier family 16 member 3	Y	18374.8	Y	82.2535	N	Y
FAM20C	Family With Sequence Similarity 20 Member C	Y	16678.3	Y	107.252	N	Y
LAT2	Linker for activation of T cells family, member 2	Y	13794.8	Y	162.203	N	Y
HK3	Hexokinase 3 (white cell)	Y	12804.1	Y	137.533	N	Y
NPL	N-acetylneuraminate pyruvate lyase	Y	12024.6	Y	30.0417	N	Y
TGM2	Transglutaminase 2	Y	11662.6	Y	119.559	N	Y
FCGRT	Fc fragment of IgG, receptor, transporter, alpha	Y	11491.6	Y	11.2525	N	Y
FGR	SRC family kinase Fgr (or SRC2)	Y	11288.1	Y	2.89774	N	Y
TMBIM1	transmembrane BAX inhibitor motif containing 1	Y	10525.4	Y	43.2654	N	Y
WDR26	WD Repeat Domain 26	Y	10502.6	Y	55.2275	N	Y
ABCA1	ATP Binding Cassette Subfamily A Member 1	Y	9450.7	Y	4.36985	N	Y
CTSC	Cathepsin C	Y	8853.69	Y	120.501	N	Y
FADS1	Fatty Acid Desaturase 1	Y	8405.75	Y	29.2826	N	Y
ALCAM	Activated leukocyte cell adhesion molecule	Y	7867.26	Y	94.793	N	Y
MAPKAPK3	Mitogen-Activated Protein Kinase-Activated Protein Kinase 3	Y	7314.87	Y	14.5859	N	Y
SLC26A11	Solute Carrier Family 26 Member 11	Y	7052.12	Y	6.60333	N	Y
HSPH1	Heat shock 105kDa/110kDa protein 1	Y	6880.76	Y	13.8522	N	Y
DUSP2	Dual specificity phosphatase 2	Y	6728.4	Y	1.57798	N	Y
MANBA	Mannosidase Beta	Y	6292.31	Y	16.6944	N	Y
TNS1	Tensin 1	Y	5381.94	Y	6.15462	N	Y
PNRC2	Proline-rich nuclear receptor coactivator 2	Y	5187.56	Y	41.7075	N	Y
DOT1L	DOT1 Like Histone H3K79 Methyltransferase	Y	5115.72		11.5833	N	Y
IQGAP2	IQ motif containing GTPase activating protein 2	Y	5099.23	Y	4.93027	N	Y
SELENOP	Selenoprotein P	Y	5061.78	Y	233.381	N	Y
VOPP1	Vesicular, overexpressed in cancer, prosurvival protein 1	Y	4908.03	Y	13.3839	N	Y
RAI14	Retinoic acid induced 14	Y	4794.41	Y	7.63114	N	Y
RGL1	Ral Guanine Nucleotide Dissociation Stimulator Like 1	Y	4036.38	Y	7.30638	N	Y
SLC1A4	Solute Carrier Family 1 Member 4	Y	3724.42	Y	2	N	Y
OSBPL11	Oxysterol binding protein-like 11	Y	3258.9	Y	10.5764	N	Y
PSD4	Pleckstrin and Sec7 domain containing 4	Y	3000.81	Y	28.9211	N	Y
SPART	Spastic Paraplegia 20	Y	2892.37	Y	8.74196	N	Y
EPS15	Epidermal Growth Factor Receptor Pathway Substrate 15	Y	2821.1	Y	18.407	N	Y
APPL2	Adaptor Protein, Phosphotyrosine Interacting With PH Domain And Leucine Zipper 2	Y	2470.03	Y	25.2805	N	Y
DHRS9	Dehydrogenase/reductase member 9	Y	2172.38	Y	3.5181	N	Y
LPCAT2	Lysophosphatidylcholine Acyltransferase 2	Y	1821.57	Y	4.60572	N	Y
C1QC	Complement Component 1, Q Subcomponent, C Chain	Y	1819.4	Y	229.706	N	Y
IGF2BP2	Insulin-like growth factor 2 mRNA binding protein 2	Y	1467.42	Y	5.30063	N	Y
FLI1	Fli-1 proto-oncogene, ETS transcription factor	Y	1380.09	Y	21.4507	N	Y
CORO1A	coronin, actin binding protein, 1A	Y	1376.41	Y	235.692	N	Y
ZBTB33	Zinc Finger And BTB Domain Containing 33	Y	1009.28	Y	5.07871	N	Y
FOXP4	Forkhead box P4	Y	989.844	Y	5.58617	N	Y
IGSF8	Immunoglobulin Superfamily Member 8	Y	933.709	Y	33.8021	N	Y
SLC39A10	Solute carrier family 39 (zinc transporter), member 10	Y	810.855	Y	3.62355	N	Y
SERPINB2	Serpin Family B Member 2	Y	797.749	Y	10	N	Y
ULK2	Unc-51 like autophagy activating kinase 2	Y	746.108	Y	7.78967	N	Y
CDR2	Cerebellar Degeneration Related Protein 2	Y	675.96	y	5.94205	N	Y
ACAP1	ArfGAP With Coiled-Coil, Ankyrin Repeat And PH Domains 1	Y	487.595	Y	7	N	Y
SLC2A6	Solute carrier family 2	Y	461.441	Y	21.2744	N	Y
SLC40A1	Solute Carrier Family 40 Member 1 (Ferroportin 1)	Y	414.948	Y	22.9214	N	Y
USP31	Ubiquitin specific peptidase 31	Y	379.387	Y	2	N	Y
DEPTOR	DEP Domain Containing MTOR-Interacting Protein	Y	330.474	Y	7.72593	N	Y
ATP8B2	ATPase Phospholipid Transporting 8B2	Y	301.5	Y	9.50126	N	Y
DNAJC18	DnaJ (Hsp40) homolog, subfamily C, member 18	Y	291.662	Y	5.80855	N	Y
RDH10	Retinol Dehydrogenase 10	Y	282.386	Y	2	N	Y
JUP	Junction Plakoglobin	Y	227.84	Y	2.29549	N	Y
HPSE	heparanase	Y	163.578	Y	84.9077	N
RNF125	Ring Finger Protein 125, E3 Ubiquitin Protein Ligase	Y	113.051	Y	12.4252	N	Y
EML1	Echinoderm microtubule associated protein like 1	Y	105.954	Y	16	N	Y
EGFR	Epidermal Growth Factor Receptor	Y	102	Y	24	N	Y

## Sheet: Criteria 5
STRENGTH OF TRANS-REGULATION BY TREM2 R2 > 0.1 (reference: in house eQTL mapping)
Gene	Gene name	Human osteoclast expression	Human OC (read count)	Mouse macrophage expression	Mouse MAC (FPKM)	Known function in osteoclasts	Mouse model available	R2 (>0.1)
MYO1D	Myosin ID	Y	46799.8	Y	3.78863	N	Y	0.158729
CD163	CD163 Molecule	Y	27299.8	Y	1	N	Y	0.140676
MYOF	Myoferlin	Y	25890.3	Y	26.3067	N	Y	0.118157
BCAT1	branched chain amino-acid transaminase 1, cytosolic	Y	23605.2	Y	13.3198	N	Y	0.21678
SLC16A3	Solute carrier family 16 member 3	Y	18374.8	Y	82.2535	N	Y	0.102139
FAM20C	Family With Sequence Similarity 20 Member C	Y	16678.3	Y	107.252	N	Y	0.110781
LAT2	Linker for activation of T cells family, member 2	Y	13794.8	Y	162.203	N	Y	0.100677
HK3	Hexokinase 3 (white cell)	Y	12804.1	Y	137.533	n	Y	0.126257
NPL	N-acetylneuraminate pyruvate lyase	Y	12024.6	Y	30.0417	N	Y	0.101719
TGM2	Transglutaminase 2	Y	11662.6	Y	119.559	N	Y	0.140491
FCGRT	Fc fragment of IgG, receptor, transporter, alpha	Y	11491.6	Y	11.2525	N	Y	0.159441
FGR	SRC family kinase Fgr (or SRC2)	Y	11288.1	Y	2.89774	N	Y	0.184632
TMBIM1	transmembrane BAX inhibitor motif containing 1	Y	10525.4	Y	43.2654	N	Y	0.112144
WDR26	WD Repeat Domain 26	Y	10502.6	Y	55.2275	N	Y	0.115116
CTSC	Cathepsin C	Y	8853.69	Y	120.501	N	Y	0.109486
MAPKAPK3	Mitogen-Activated Protein Kinase-Activated Protein Kinase 3	Y	7314.87	Y	14.5859	N	Y	0.100466
HSPH1	Heat shock 105kDa/110kDa protein 1	Y	6880.76	Y	13.8522	N	Y	0.105233
DUSP2	Dual specificity phosphatase 2	Y	6728.4	Y	1.57798	N	Y	0.165668
PNRC2	Proline-rich nuclear receptor coactivator 2	Y	5187.56	Y	41.7075	N	Y	0.1169
IQGAP2	IQ motif containing GTPase activating protein 2	Y	5099.23	Y	4.93027	N	Y	0.112993
SELENOP	Selenoprotein P	Y	5061.78	Y	233.381	N	Y	0.101671
RAI14	Retinoic acid induced 14	Y	4794.41	Y	7.63114	N	Y	0.124697
RGL1	Ral Guanine Nucleotide Dissociation Stimulator Like 1	Y	4036.38	Y	7.30638	N	Y	0.101591
SLC1A4	Solute Carrier Family 1 Member 4	Y	3724.42	Y	2	N	Y	0.123069
OSBPL11	Oxysterol binding protein-like 11	Y	3258.9	Y	10.5764	N	Y	0.118145
EPS15	Epidermal Growth Factor Receptor Pathway Substrate 15	Y	2821.1	Y	18.407	N	Y	0.101068
APPL2	Adaptor Protein, Phosphotyrosine Interacting With PH Domain And Leucine Zipper 2	Y	2470.03	Y	25.2805	N	Y	0.101075
DHRS9	Dehydrogenase/reductase member 9	Y	2172.38	Y	3.5181	N	Y	0.128073
LPCAT2	Lysophosphatidylcholine Acyltransferase 2	Y	1821.57	Y	4.60572	N	Y	0.106905
C1QC	Complement Component 1, Q Subcomponent, C Chain	Y	1819.4	Y	229.706	N	Y	0.110593
IGF2BP2	Insulin-like growth factor 2 mRNA binding protein 2	Y	1467.42	Y	5.30063	N	Y	0.118135
FLI1	Fli-1 proto-oncogene, ETS transcription factor	Y	1380.09	Y	21.4507	N	Y	0.112269
CORO1A	coronin, actin binding protein, 1A	Y	1376.41	Y	235.692	N	Y	0.171695
FOXP4	Forkhead box P4	Y	989.844	Y	5.58617	N	Y	0.238426
IGSF8	Immunoglobulin Superfamily Member 8	Y	933.709	Y	33.8021	N	Y	0.127708
SERPINB2	Serpin Family B Member 2	Y	797.749	Y	10	N	Y	0.124429
ULK2	Unc-51 like autophagy activating kinase 2	Y	746.108	Y	7.78967	N	Y	0.109312
CDR2	Cerebellar Degeneration Related Protein 2	Y	675.96	y	5.94205	N	Y	0.134698
ACAP1	ArfGAP With Coiled-Coil, Ankyrin Repeat And PH Domains 1	Y	487.595	Y	7	N	Y	0.13561
SLC40A1	Solute Carrier Family 40 Member 1 (Ferroportin 1)	Y	414.948	Y	22.9214	N	Y	0.0995581
USP31	Ubiquitin specific peptidase 31	Y	379.387	Y	2	N	Y	0.111774
DEPTOR	DEP Domain Containing MTOR-Interacting Protein	Y	330.474	Y	7.72593	N	Y	0.104043
ATP8B2	ATPase Phospholipid Transporting 8B2	Y	301.5	Y	9.50126	N	Y	0.108203
RDH10	Retinol Dehydrogenase 10	Y	282.386	Y	2	N	Y	0.153993
JUP	Junction Plakoglobin	Y	227.84	Y	2.29549	N	Y	0.106011
HPSE	heparanase	Y	163.578	Y	84.9077	N		0.151322
RNF125	Ring Finger Protein 125, E3 Ubiquitin Protein Ligase	Y	113.051	Y	12.4252	N	Y	0.108683

## Sheet: Criteria 6
THE GENE IS A EXPRESSED IN THE PLASMA MEMBRANE
Gene	Gene name	Human osteoclast expression	Human OC (read count)	Mouse macrophage expression	Mouse MAC (FPKM)	Known function in osteoclasts	Mouse model available	R2 (>0.1)	Plasma membrane
CD163	CD163 Molecule	Y	27299.8	Y	1	N	Y	0.140676	Y
MYOF	Myoferlin	Y	25890.3	Y	26.3067	N	Y	0.118157	Y
SLC16A3	Solute carrier family 16 member 3	Y	18374.8	Y	82.2535	N	Y	0.102139	Y
LAT2	Linker for activation of T cells family, member 2	Y	13794.8	Y	162.203	N	Y	0.100677	Y
FCGRT	Fc fragment of IgG, receptor, transporter, alpha	Y	11491.6	Y	11.2525	N	Y	0.159441	Y
FGR	SRC family kinase Fgr (or SRC2)	Y	11288.1	Y	2.89774	N	Y	0.184632	Y
IQGAP2	IQ motif containing GTPase activating protein 2	Y	5099.23	Y	4.93027	N	Y	0.112993	Y
SLC1A4	Solute Carrier Family 1 Member 4	Y	3724.42	Y	2	N	Y	0.123069	Y
EPS15	Epidermal Growth Factor Receptor Pathway Substrate 15	Y	2821.1	Y	18.407	N	Y	0.101068	Y
APPL2	Adaptor Protein, Phosphotyrosine Interacting With PH Domain And Leucine Zipper 2	Y	2470.03	Y	25.2805	N	Y	0.101075	Y
IGSF8	Immunoglobulin Superfamily Member 8	Y	933.709	Y	33.8021	N	Y	0.127708	Y
SLC40A1	Solute Carrier Family 40 Member 1 (Ferroportin 1)	Y	414.948	Y	22.9214	N	Y	0.0995581	Y
ATP8B2	ATPase Phospholipid Transporting 8B2	Y	301.5	Y	9.50126	N	Y	0.108203	Y

## Sheet: Candidate genes
CANDIDATE GENES after excluding OBCD genes and lines showing no abnormal bone phenotype on IMPC (https://www.mousephenotype.org/)
Gene	Gene name	Human osteoclast expression	Human OC (read count)	Mouse macrophage expression	Mouse MAC (FPKM)	Known function in osteoclasts	Mouse model available	R2 (>0.1)	Plasma membrane
MYOF	Myoferlin	Y	25890.3	Y	26.3067	N	Y	0.118157	Y
LAT2	Linker for activation of T cells family, member 2	Y	13794.8	Y	162.203	N	Y	0.100677	Y
FCGRT	Fc fragment of IgG, receptor, transporter, alpha	Y	11491.6	Y	11.2525	N	Y	0.159441	Y
FGR	SRC family kinase Fgr (or SRC2)	Y	11288.1	Y	2.89774	N	Y	0.184632	Y
SLC40A1	Solute Carrier Family 40 Member 1 (Ferroportin 1)	Y	414.948	Y	22.9214	N	Y	0.0995581	Y
