# Supplementary material for: A trans-eQTL network regulates osteoclast multinucleation and bone mass
Source: eLife. 2020 Jun 19;9:e55549. doi: 10.7554/eLife.55549 (PMC7351491; doi:10.7554/eLife.55549)
Supplement: Supplementary file 1. [file elife-55549-supp1.xlsx]

## Sheet: Sheet1
	Gene name	Forward primer	Reverse primer	specie
	APPL2	AGCATGACCTCTCAATGGCAA	CCATGTCTGCAACGGAGGAT	human
	ATP8B2	GCCACAAGAGCGATAACCAG	CTCACTGCTGGAAAGGAGGA	human
	BCAT1	TGTACTCTTGAGCCCAGTGG	AGTCCCCAGTTCCACCTTTC	human
	DCSTAMP	CTTGCCAGGGTTTGAGGTTC	AACACTGAGAGGAACCCAGG	human
	DEPTOR	GTAAGCCATGCCACATCCAG	GGCCCGTCAGAATCAGATTG	human
	DOT1L	TGGTGCTGAGGAAGAGAAGG	GAGGGGATCTGTAGGCATCC	human
	EGFR	GTGAGCCAAGGGAGTTTGTG	TCCAGACCAGGGTGTTGTTT	human
	EML1	GCGGCTGAACATTACTGAGG	ACACAGTGCCATTGTTGACC	human
	EPS15	TGGAGGTGGATTTGCTGACT	GTAGAGGGCAGGGTCTTGTT	human
	IGSF8	CAATGTGTCAGGGGCACTTC	TGTTCTGGATGCCACCTTCT	human
	PIK3CB	AGCTGGTTTGGATCTTCGGA	CAGGTCATCCCCAGAGTTGT	human
	RNF125	TCTGCCGTTCCTGTATTGCT	AGTCCGAATATGTGCCCTCA	human
	SLC1A4	TCTTGTGGTTGCAGCTTTCC	CCACTCCTAACACCAGAGCA	human
	SLC40A1	TCTCTACTTGGGGAGATCGGA	AGCATTCTTGTCCACCCAGT	human
